# Supplementary material
Source: MDPI journal article supplement (https://www.mdpi.com/2076-3298/8/6/58)
Supplement: s1 [file s1]

# An In Silico and In Vitro study for Investigating Estrogenic Endocrine Effects of Emerging Persistent Pollutants using Primary Hepatocytes from Grey Mullet (*Mugil Cephalus*)

Paolo Cocci, Gilberto Mosconi and Francesco A. Palermo \*

School of Biosciences and Veterinary Medicine, University of Camerino, Via Gentile III Da Varano, I-62032 Camerino (MC), Italy; paolo.cocci@unicam.it (P.C.); francesco.palermo@unicam.it (F.A.P.); gilberto.mosconi@unicam.it (G.M.)

\* Correspondence: francesco.palermo@unicam.it

## Supplementary Materials

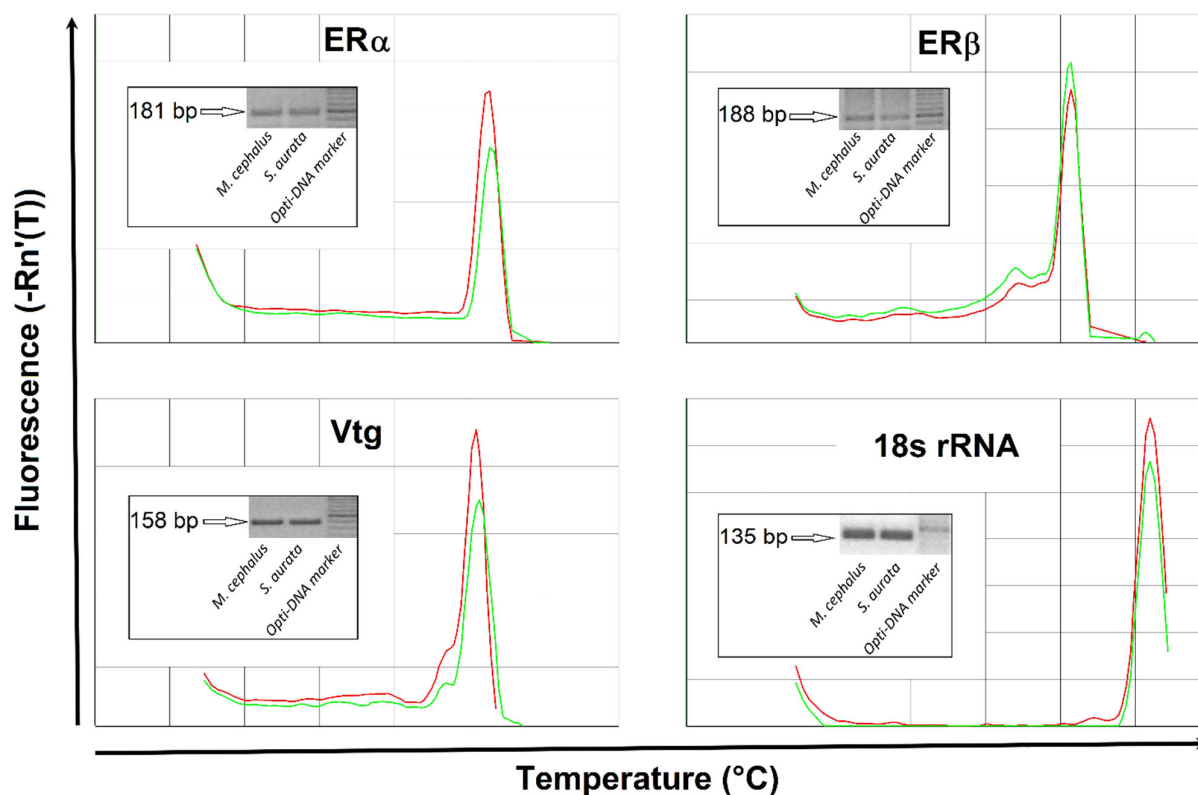

**Figure S1.** Results of PCR amplification using template DNA from *Mugil cephalus* or *Sparus aurata*. Both the presence of a single band of the expected size on 1.7% agarose gel electrophoresis and the single peak of dissociation curve indicate the specificity of the PCR products. Bp, base pairs; Estrogen receptor  $\alpha$  (ER $\alpha$ ), Estrogen receptor  $\beta$  (ER $\beta$ ), Vitellogenin (Vtg), 18S rRNA housekeeping gene.
